# Supplementary material for: Programmed Death Ligand-1 and Tumor Burden Score Dictate Treatment Responses in Patients with Recurrent or Metastatic Head and Neck Squamous Cell Carcinoma
Source: MDPI journal article supplement (doi:10.3390/cancers16091748), 2024-04-30
Supplement: s1 [file s1]

Supplementary Materials: Programmed death ligand-1 and tumor burden score dictate treatment responses in patients with recurrent or metastatic head and neck squamous cell carcinoma.

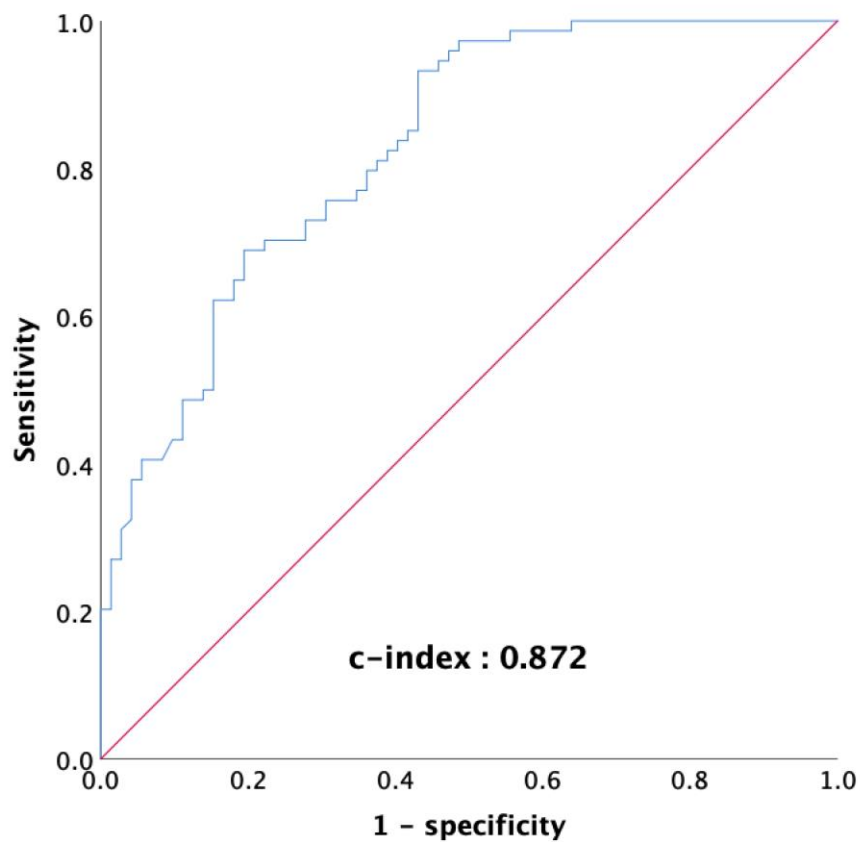

Supplementary Figure S1: Receiver operating characteristic curve.
